# Supplementary material for: Predictive Role of the D-Dimer Level in Acute Kidney Injury in Living Donor Liver Transplantation: A Retrospective Observational Cohort Study
Source: MDPI journal article supplement (doi:10.3390/jcm11020450), 2022-01-16
Supplement: s1 [file s1]

**Table S1.** Associations of pre- and intraoperative factors with the occurrence of AKI in living donor liver transplantation.

|                                                 | Univariable analysis |            |             |       | Multivariable analysis |            |        |     |
|-------------------------------------------------|----------------------|------------|-------------|-------|------------------------|------------|--------|-----|
|                                                 | $\beta$              | Odds ratio | 95% CI      | $p$   | $\beta$                | Odds ratio | 95% CI | $p$ |
| <b>Preoperative recipient factor</b>            |                      |            |             |       |                        |            |        |     |
| Age (years)                                     | -0.005               | 0.995      | 0.976-1.015 | 0.648 |                        |            |        |     |
| Sex (male vs. female)                           | -0.288               | 0.750      | 0.492-1.143 | 0.180 |                        |            |        |     |
| Body mass index (kg/m <sup>2</sup> )            | 0.042                | 1.042      | 0.994-1.093 | 0.085 |                        |            |        |     |
| <i>Comorbidity</i>                              |                      |            |             |       |                        |            |        |     |
| Diabetes mellitus                               | 0.441                | 1.554      | 1.036-2.330 | 0.033 |                        |            |        |     |
| Hypertension                                    | 0.035                | 1.035      | 0.653-1.641 | 0.883 |                        |            |        |     |
| MELD score (point)                              | 0.018                | 1.018      | 1.001-1.035 | 0.035 |                        |            |        |     |
| <i>Hepatic decompensation</i>                   |                      |            |             |       |                        |            |        |     |
| Encephalopathy<br>(West-Haven criteria I or II) | 0.417                | 1.517      | 0.828-2.778 | 0.177 |                        |            |        |     |
| Varix                                           | 0.179                | 1.197      | 0.783-1.829 | 0.407 |                        |            |        |     |
| Ascites                                         | 0.522                | 1.685      | 1.157-2.453 | 0.007 |                        |            |        |     |
| <i>Cardiac function</i>                         |                      |            |             |       |                        |            |        |     |
| Ejection fraction (%)                           | 0.029                | 1.029      | 0.987-1.072 | 0.175 |                        |            |        |     |
| Diastolic dysfunction                           | 0.161                | 1.175      | 0.807-1.709 | 0.401 |                        |            |        |     |
| <i>Renal function</i>                           |                      |            |             |       |                        |            |        |     |
| eGFR (mL/min/1.73 m <sup>2</sup> )              | 0.002                | 1.002      | 0.997-1.006 | 0.510 |                        |            |        |     |
| <i>Laboratory variables</i>                     |                      |            |             |       |                        |            |        |     |
| Hemoglobin (g/dL)                               | -0.116               | 0.891      | 0.816-0.973 | 0.010 |                        |            |        |     |
| WBC count (x 10 <sup>9</sup> /L)                | 0.017                | 1.017      | 0.986-1.049 | 0.288 |                        |            |        |     |
| Albumin (g/dL)                                  | -0.564               | 0.569      | 0.408-0.793 | 0.001 |                        |            |        |     |

|                                         |           |        |             |        |        |       |             |       |
|-----------------------------------------|-----------|--------|-------------|--------|--------|-------|-------------|-------|
| Platelet count (x 10 <sup>9</sup> /L)   | -0.007    | 0.993  | 0.989-0.997 | 0.001  | -0.005 | 0.995 | 0.991-0.999 | 0.014 |
| International normalized ratio          | 0.126     | 1.135  | 0.913-1.410 | 0.255  |        |       |             |       |
| Activated partial thrombin time (sec)   | 0.004     | 1.004  | 0.986-1.022 | 0.686  |        |       |             |       |
| D-dimer (mg/L) (dichotomized)           |           |        |             |        |        |       |             |       |
| Normal D-dimer level (0.5≤ mg/L)        | Reference |        |             |        |        |       |             |       |
| High D-dimer level (>0.5 mg/L)          | 1.408     | 4.392  | 1.984-9.722 | <0.001 | 1.027  | 2.792 | 1.227-6.353 | 0.014 |
| Sodium (mEq/L)                          | -0.020    | 0.980  | 0.947-1.014 | 0.240  |        |       |             |       |
| Potassium (mEq/L)                       | -0.138    | 0.871  | 0.636-1.192 | 0.388  |        |       |             |       |
| Calcium (mg/dL)                         | -0.116    | 0.891  | 0.697-1.138 | 0.355  |        |       |             |       |
| Glucose (mg/dL)                         | 0.001     | 1.001  | 0.998-1.004 | 0.505  |        |       |             |       |
| Creatinine (mg/dL)                      | -0.135    | 0.873  | 0.723-1.055 | 0.161  |        |       |             |       |
| Ammonia (μg/dL)                         | 0.001     | 1.001  | 0.999-1.003 | 0.338  |        |       |             |       |
| <b>Intraoperative recipient factor</b>  |           |        |             |        |        |       |             |       |
| Surgical duration (min)                 | 0.001     | 1.001  | 0.999-1.003 | 0.361  |        |       |             |       |
| Postreperfusion syndrome                | 0.215     | 1.240` | 0.852-1.805 | 0.261  |        |       |             |       |
| Average of vital signs                  |           |        |             |        |        |       |             |       |
| MBP (mmHg)                              | -0.018    | 0.982  | 0.964-1.001 | 0.060  |        |       |             |       |
| HR (beats/min)                          | 0.010     | 1.010  | 0.998-1.021 | 0.096  |        |       |             |       |
| CVP (mmHg)                              | 0.043     | 1.044  | 0.985-1.107 | 0.148  |        |       |             |       |
| Mean lactate (mmol/L)                   | 0.035     | 1.036  | 0.972-1.104 | 0.280  |        |       |             |       |
| <i>Blood product transfusion (unit)</i> |           |        |             |        |        |       |             |       |
| Packed red blood cell                   | 0.029     | 1.030  | 1.009-1.050 | 0.004  |        |       |             |       |
| Fresh frozen plasma                     | 0.031     | 1.031  | 1.006-1.057 | 0.014  |        |       |             |       |
| Platelet concentrate                    | 0.001     | 1.001  | 0.988-1.013 | 0.915  |        |       |             |       |
| Hourly fluid infusion (mL/kg/h)         | 0.011     | 1.011  | 0.994-1.029 | 0.198  |        |       |             |       |
| Hourly urine output (mL/kg/h)           | -0.464    | 0.629  | 0.511-0.773 | <0.001 | -0.362 | 0.696 | 0.565-0.858 | 0.001 |

**Donor-graft factor**

|                           |        |       |             |        |
|---------------------------|--------|-------|-------------|--------|
| Age (years)               | -0.003 | 0.997 | 0.980-1.014 | 0.740  |
| Sex(male)                 | -0.100 | 0.905 | 0.585-1.400 | 0.653  |
| GRWR (%)                  | 0.226  | 1.253 | 0.857-1.832 | 0.244  |
| Graft ischemic time (min) | 0.003  | 1.003 | 1.001-1.004 | <0.001 |
| Fatty change (%)          | 0.006  | 1.006 | 0.979-1.006 | 0.669  |

---

Abbreviations: CI, confidence interval; CVP, central venous pressure; eGFR, estimated glomerular filtration rate; GRWR, graft-recipient weight ratio; HR, heart rate; MBP, mean blood pressure; MELD, Model for End-Stage Liver Disease; WBC, white blood cell.

**Table S2.** Comparison of the prevalences of AKI between the normal and high D-dimer groups of DM patients.

| Group | Normal D-dimer ( $\leq 0.5$ mg/L) | High D-dimer ( $> 0.5$ mg/L) | <i>p</i> |
|-------|-----------------------------------|------------------------------|----------|
| n     | 21                                | 141                          |          |
| AKI   | 3(14.3%)                          | 45(31.9%)                    | 0.099    |

  

| Group | Normal D-dimer ( $\leq 1.1$ mg/L) | High D-dimer ( $> 1.1$ mg/L) | <i>p</i> |
|-------|-----------------------------------|------------------------------|----------|
| n     | 39                                | 123                          |          |
| AKI   | 5(10.4%)                          | 43(35%)                      | 0.008    |

Abbreviations: AKI, acute kidney injury. NOTE: Values are expressed as numbers (with % proportion).

**Table S3.** Comparison of the D-dimer levels between the non-AKI and AKI groups of DM patients.

| Group          | non-AKI      | AKI          | <i>p</i> |
|----------------|--------------|--------------|----------|
| n              | 114          | 48           |          |
| D-dimer (mg/L) | 2.6(0.8-7.2) | 4.2(2.4-8.8) | 0.024    |

Abbreviations: AKI, acute kidney injury. NOTE: Values are expressed as medians (interquartile ranges).

**Table S4.** Comparison of the prevalences of AKI between the normal and high D-dimer groups of patients with hepatitis B virus.

| Group | Normal D-dimer ( $\leq 0.5$ mg/L) | High D-dimer ( $> 0.5$ mg/L) | <i>p</i> |
|-------|-----------------------------------|------------------------------|----------|
| n     | 72                                | 277                          |          |
| AKI   | 5(6.9%)                           | 74(26.7%)                    | <0.001   |

Abbreviations: AKI, acute kidney injury. NOTE: Values are expressed as numbers (with % proportion).

**Table S5.** Comparison of the D-dimer levels between the non-AKI and AKI groups of patients with hepatitis B virus

| Group          | non-AKI       | AKI          | <i>p</i> |
|----------------|---------------|--------------|----------|
| n              | 270           | 79           |          |
| D-dimer (mg/L) | 1.85(0.5-4.9) | 4.4(2.2-8.9) | <0.001   |

Abbreviations: AKI, acute kidney injury. NOTE: Values are expressed as medians (interquartile ranges).

**Table S6.** Comparison of the prevalences of AKI between the normal and high D-dimer groups of patients with heart disease (diastolic dysfunction).

| Group | Normal D-dimer ( $\leq 0.5$ mg/L) | High D-dimer ( $> 0.5$ mg/L) | <i>p</i> |
|-------|-----------------------------------|------------------------------|----------|
| n     | 36                                | 222                          |          |
| AKI   | 2(5.6%)                           | 63(28.4%)                    | 0.003    |

Abbreviations: AKI, acute kidney injury. NOTE: Values are expressed as numbers (with % proportion).

**Table S7.** Comparison of the D-dimer levels between the non-AKI and AKI groups of patients with heart disease (diastolic dysfunction).

| Group          | non-AKI      | AKI           | <i>p</i> |
|----------------|--------------|---------------|----------|
| n              | 193          | 65            |          |
| D-dimer (mg/L) | 2.5(0.7-6.0) | 6.1(3.0-11.2) | <0.001   |

Abbreviations: AKI, acute kidney injury. NOTE: Values are expressed as medians (interquartile ranges).
